# Supplementary material for: Virtual training of practical competences in sonography
Source: HNO. 2024 Apr 8;72(5):350–6. [Article in German] doi: 10.1007/s00106-024-01476-1 (PMC11045615; doi:10.1007/s00106-024-01476-1)
Supplement: Supplementary file 1 [file 106_2024_1476_MOESM1_ESM.pdf]

Kopf-Hals-Sonographie Sommersemester 2021

Datum:

Vorerfahrung Sonographie: Ja ☐ Nein ☐

Klinisches Semester:

Gruppe: A ☐ B ☐

### Einführung

| Ultraschall allgemein                                                         | falsch                | Abzüge     |
|-------------------------------------------------------------------------------|-----------------------|------------|
| Echogenität:                                                                  |                       |            |
| • Alle aufzählen                                                              | <input type="radio"/> | -2         |
| • Beispiel für <b>EINE</b> der Echogenitäten abfragen, also entweder:         |                       |            |
| a) Echoreich (z.B. Drüse)                                                     |                       |            |
| b) Echoarm (z.B. Muskel)                                                      |                       |            |
| c) Echoleer (z.B. Gefäß)                                                      | <input type="radio"/> | -2         |
| Orientierung am Ultraschallgerät/ -bild: (Fingertest horizontal und vertikal) | <input type="radio"/> | -2         |
| <b>Bonuspunkt:</b> US-Gel aufgetragen                                         | <input type="radio"/> | +1         |
| <b>Abzug gesamt:</b>                                                          |                       | <b>/ 6</b> |
| <b>Bonuspunkte:</b>                                                           |                       | <b>/ 1</b> |

### 1) Schnitt

| Schilddrüse bis Os hyoideum    | falsch                | Abzüge     |
|--------------------------------|-----------------------|------------|
| Schilddrüse:                   |                       |            |
| • Schallkopfhaltung horizontal | <input type="radio"/> | -2         |
| • Strukturen erkennen:         |                       |            |
| ▪ Schilddr: Isth/SDL bds       | <input type="radio"/> | -2         |
| ▪ A. carotis communis          | <input type="radio"/> | -1         |
| ▪ V. jugularis interna         | <input type="radio"/> | -1         |
| ▪ M. sternocleidomast.         | <input type="radio"/> | -2         |
| ▪ Trachea                      | <input type="radio"/> | -1         |
| ▪ <b>Bonus:</b> Ösophagus      | <input type="radio"/> | +1         |
| ▪ <b>Bonus:</b> Os hyoideum    | <input type="radio"/> | +2         |
| ▪ <b>Bonus:</b> Sonopalpation  | <input type="radio"/> | +1         |
| <b>Abzug gesamt:</b>           |                       | <b>/ 9</b> |
| <b>Bonuspunkte:</b>            |                       | <b>/ 4</b> |

### 2) Schnitt

| Mundboden                      | falsch                | Abzug       |
|--------------------------------|-----------------------|-------------|
| • Schallkopfhaltung horizontal | <input type="radio"/> | -2          |
| • Schallkopfhaltung vertikal   | <input type="radio"/> | -2          |
| • Darstellung horizontal:      |                       |             |
| ▪ M. mylohyoideus              | <input type="radio"/> | -1          |
| ▪ M. geniohyoideus             | <input type="radio"/> | -1          |
| ▪ M. genioglossus              | <input type="radio"/> | -1          |
| ▪ M. digastricus (beidseits)   | <input type="radio"/> | -2          |
| ▪ <b>Bonus:</b> Mickey Mouse   | <input type="radio"/> | +1          |
| ▪ <b>Bonus:</b> Zungenoberfl   | <input type="radio"/> | +1          |
| • Darstellung vertikal:        |                       |             |
| ▪ Mandibula                    | <input type="radio"/> | -1          |
| ▪ <b>Bonuspunkt:</b> Os hyoid  | <input type="radio"/> | +1          |
| <b>Abzug gesamt:</b>           |                       | <b>/ 10</b> |
| <b>Bonuspunkte:</b>            |                       | <b>/ 3</b>  |

### 3) Schnitt

| Lateraler Hals                      | falsch                | Abzüge     |
|-------------------------------------|-----------------------|------------|
| • Schallkopfhaltung horizontal      | <input type="radio"/> | -2         |
| • Darstellung:                      |                       |            |
| ▪ A. carotis communis               | <input type="radio"/> | -2         |
| ▪ Bifurkation A. carotis communis   | <input type="radio"/> | -1         |
| ▪ V. jugularis interna              | <input type="radio"/> | -1         |
| ▪ M. sternocleidomastoideus         | <input type="radio"/> | -2         |
| ▪ <b>Bonuspunkt:</b> M. omohyoideus | <input type="radio"/> | +1         |
| <b>Abzug gesamt:</b>                |                       | <b>/ 8</b> |
| <b>Bonuspunkte:</b>                 |                       | <b>/ 1</b> |

### 4) Schnitt

| Regio submandibularis          | falsch                | Abzüge     |
|--------------------------------|-----------------------|------------|
| • Schallkopfhaltung horizontal | <input type="radio"/> | -2         |
| • Darstellung:                 |                       |            |
| ▪ Gl. parotis                  | <input type="radio"/> | -1         |
| ▪ Gl. submandibularis          | <input type="radio"/> | -2         |
| ▪ A. facialis                  | <input type="radio"/> | -1         |
| ▪ Zungenbinnenmuskulatur       | <input type="radio"/> | -1         |
| <b>Abzug gesamt:</b>           |                       | <b>/ 7</b> |

### 5) Schnitt

| Regio parotidea                      | falsch                | Abzüge     |
|--------------------------------------|-----------------------|------------|
| • Schallkopfhaltung horizontal       | <input type="radio"/> | -2         |
| • Schallkopfhaltung vertikal         | <input type="radio"/> | -2         |
| • Darstellung:                       |                       |            |
| ▪ Gl. parotis (KW & präauriculär)    | <input type="radio"/> | -2         |
| ▪ Mandibula (distale Auslöschung)    | <input type="radio"/> | -1         |
| ▪ M. masseter (inkl. Testung)        | <input type="radio"/> | -2         |
| ▪ <b>Bonuspunkt:</b> Übers. GP/MM/UK | <input type="radio"/> | +1         |
| <b>Abzug gesamt:</b>                 |                       | <b>/ 9</b> |
| <b>Bonuspunkte:</b>                  |                       | <b>/ 1</b> |

### 6) Schnitt

| Hintere Halsabschnitte            | falsch                | Abzüge     |
|-----------------------------------|-----------------------|------------|
| • Schallkopfhaltung vertikal      | <input type="radio"/> | -2         |
| • Darstellung:                    |                       |            |
| ▪ ACC                             | <input type="radio"/> | -2         |
| ▪ V. jugularis interna            | <input type="radio"/> | -1         |
| ▪ M. sternocleidomastoideus       | <input type="radio"/> | -2         |
| ▪ <b>Bonuspunkt:</b> Wirbelkörper | <input type="radio"/> | +1         |
| <b>Abzug gesamt:</b>              |                       | <b>/ 7</b> |
| <b>Bonuspunkte:</b>               |                       | <b>/ 1</b> |

Reihenfolge Gesamtuntersuchung ☐ -3

Aufforderung zu Untersuchung nötig ☐ -2

Abzug gesamt: \_\_\_\_\_ Erreichte Punkte: \_\_\_\_\_ / 61 Bonuspunkte \_\_\_\_\_ / 11
